# Supplementary material
Source: MDPI journal article supplement (https://www.mdpi.com/2311-5637/9/3/224)
Supplement: s1 [file s1 › fermentation-2241055-supplementary.pdf]

## **Supplementary Material**

### **Performance and bacterial characteristics of aerobic granular sludge in treatment of ultra-hypersaline mustard tuber wastewater**

Jingxue Yue<sup>1,2</sup>, Xushen Han<sup>1,2</sup> \*, Yan Jin<sup>2</sup>, Jianguo Yu<sup>1,2</sup> \*

<sup>1</sup> State Environmental Protection Key Laboratory of Environmental Risk Assessment and Control on Chemical Process, East China University of Science and Technology, 130 Meilong Road, Shanghai 200237, China.

<sup>2</sup> National Engineering Research Center for Integrated Utilization of Salt Lake Resources, East China University of Science and Technology, 130 Meilong Road, Shanghai 200237, China.

\* Corresponding author:

Xushen Han, Tel/fax: +86-21-64252173, Email: xushen.han@ecust.edu.cn

Jianguo Yu, Tel/fax: +86-21-64252170, Email: jgyu@ecust.edu.cn

Supplementary material consists of 1 table over 2 pages.

**Table S1.** The organic acid concentrations of mustard tuber wastewater.

| Organic acid   | Concentration (mg/L) |
|----------------|----------------------|
| Lactic acid    | 5830                 |
| Acetic acid    | 1788                 |
| Propionic acid | 1267                 |
| Succinic acid  | 1383                 |
| Citric acid    | 538                  |
| Oxalic acid    | 15                   |
